# Supplementary material for: Plasmon-enhanced visible-light photocatalytic antibacterial activity of metal–organic framework/gold nanocomposites
Source: Royal Society of Chemistry journal article supplement (doi:10.1039/d2ta09061a), 2022-12-30
Supplement: d2ta09061a1.pdf [file d2ta09061a1.pdf]

Electronic Supplementary Information

**Plasmon-enhanced visible-light photocatalytic antibacterial activity of metal-organic framework/gold nanocomposites**

Wenfeng Guo,<sup>a</sup> Wenxing Gao,<sup>a</sup> Qiang Li,<sup>a</sup> Shaohua Qu,<sup>a</sup> Lianbing Zhang,<sup>b</sup> Li-Li Tan<sup>\*a</sup> and Li Shang<sup>\*ac</sup>

<sup>a</sup> State Key Laboratory of Solidification Processing, School of Materials Science and Engineering, Research & Development Institute of Northwestern Polytechnical University in Shenzhen, Northwestern Polytechnical University, Xi'an 710072, China

<sup>b</sup> School of Life Sciences, Northwestern Polytechnical University, Xi'an 710072, China

<sup>c</sup> NPU-QMUL Joint Research Institute of Advanced Materials and Structures (JRI-AMAS), Northwestern Polytechnical University, Xi'an 710072, China

E-mail: li.shang@nwpu.edu.cn; tanlili@nwpu.edu.cn

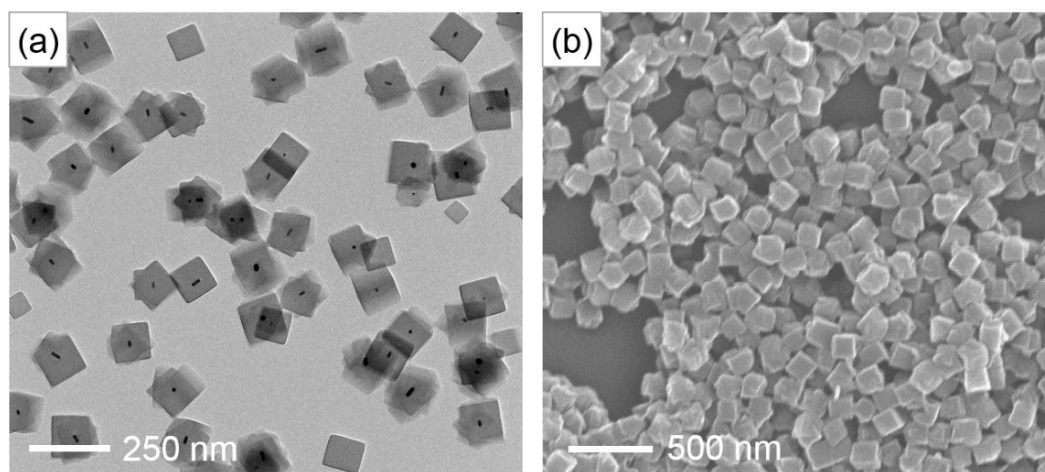

**Fig. S1** (a) TEM and (b) SEM images of AuNR@ZIF-8.

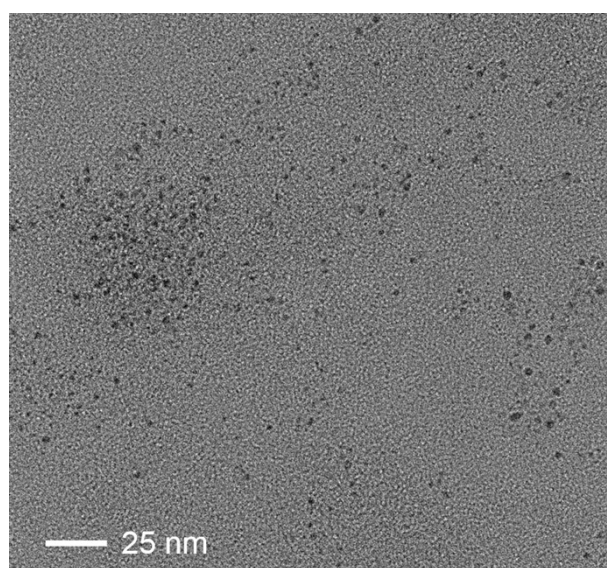

**Fig. S2.** TEM image of AuNCs.

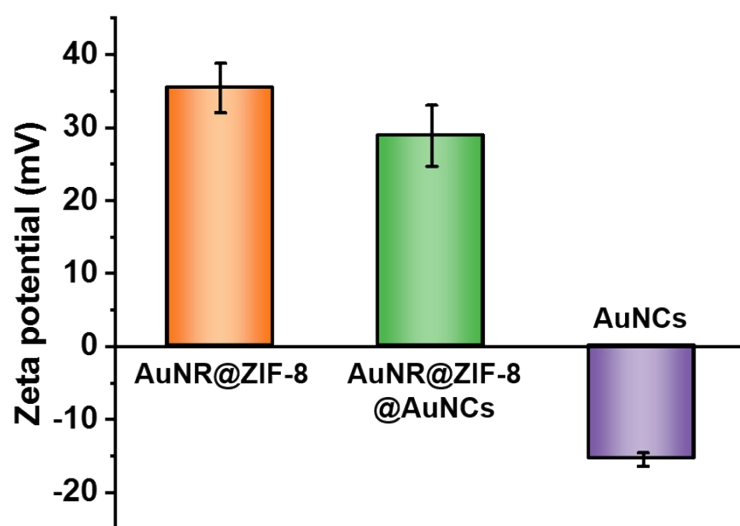

**Fig. S3.** Zeta potential results of different samples in aqueous solution (n: 3).

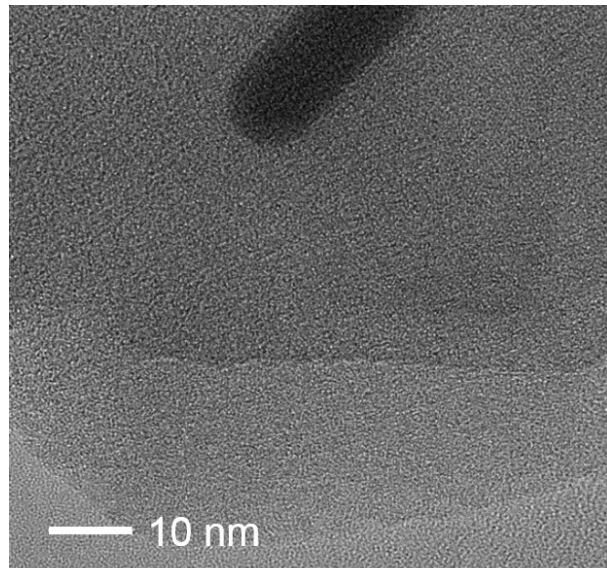

**Fig. S4.** TEM image of AuNR@ZIF-8.

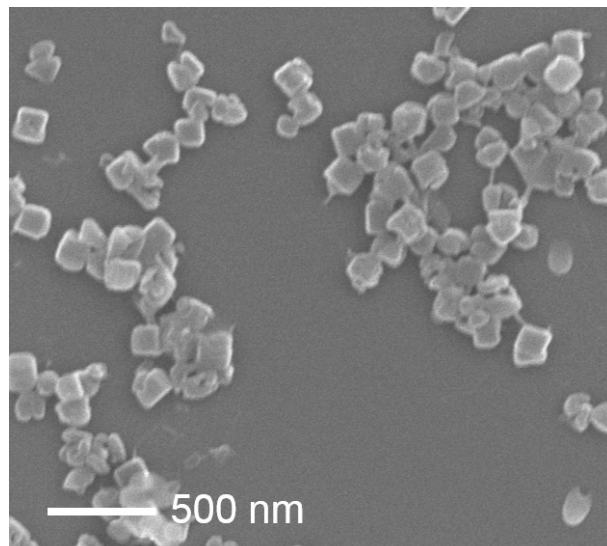

**Fig. S5.** SEM image of AuNR@ZIF-8@AuNCs.

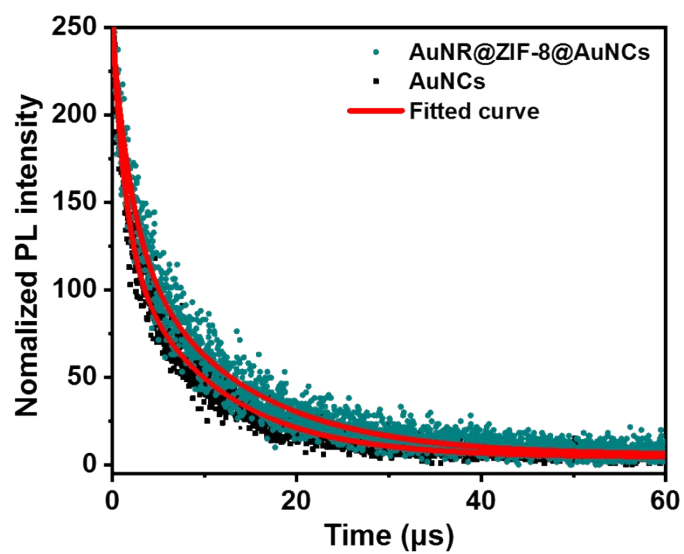

**Fig. S6.** Fluorescence decay spectra of ZIF-8 and AuNR@ZIF-8 under irradiation of 405 nm light.

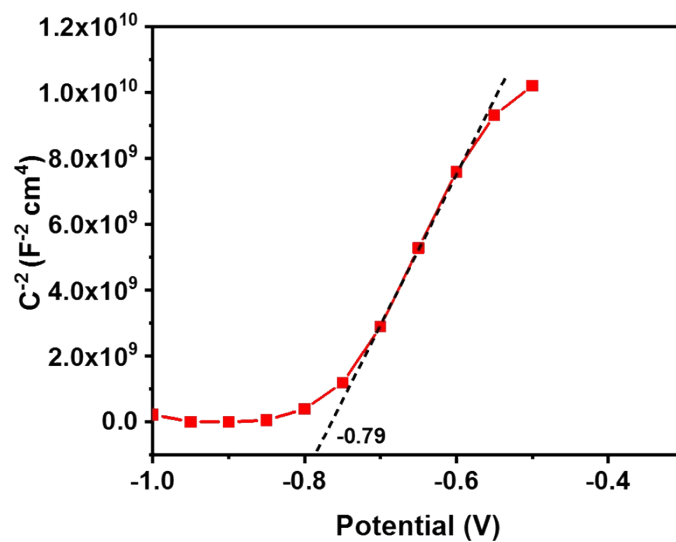

**Fig. S7.** Mott-Schottky plots of ZIF-8.

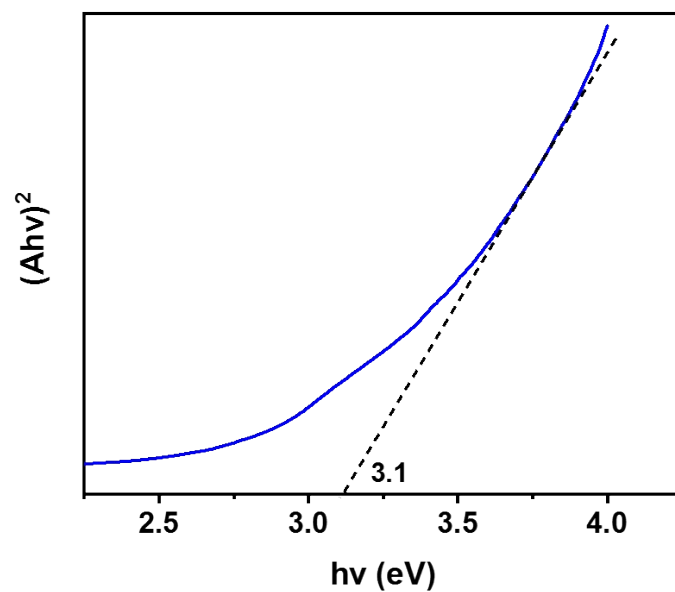

**Fig. S8.** Tauc plot of ZIF-8. Its bandgap was calculated to be 3.1 eV.

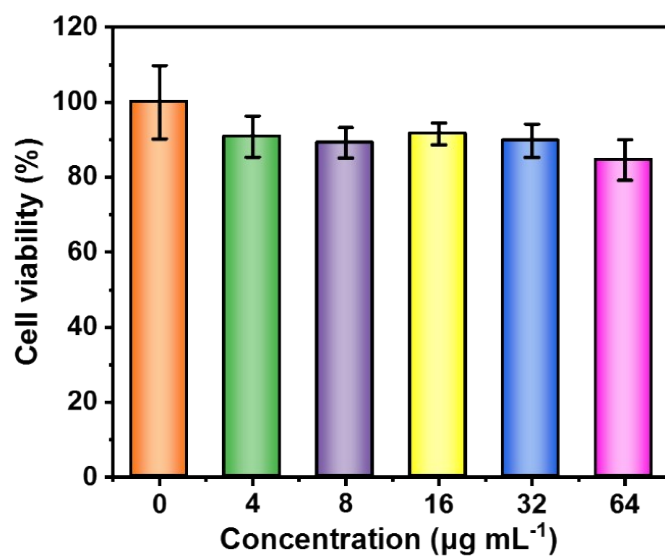

**Fig. S9.** CCK8 results of L929 cells treated with AuNR@ZIF-8@AuNCs at different concentrations for 24 h.

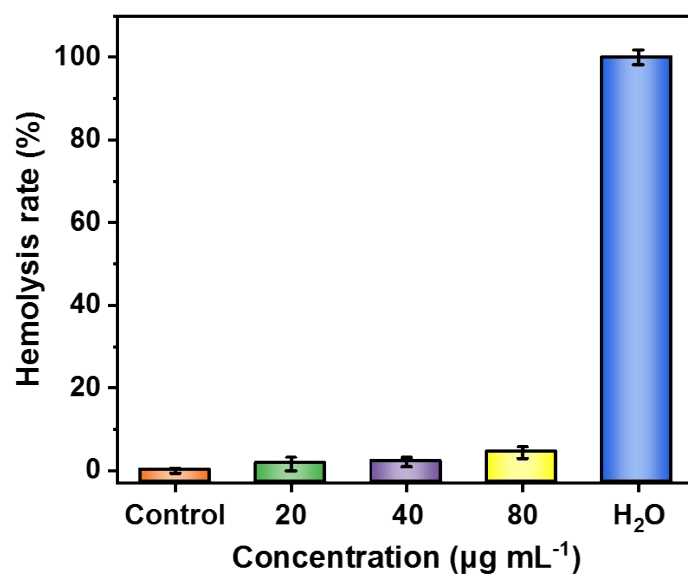

**Fig. S10.** Hemolysis assay of mice red blood cells in the presence of AuNR@ZIF-8@AuNCs sample at various concentrations (n = 3).

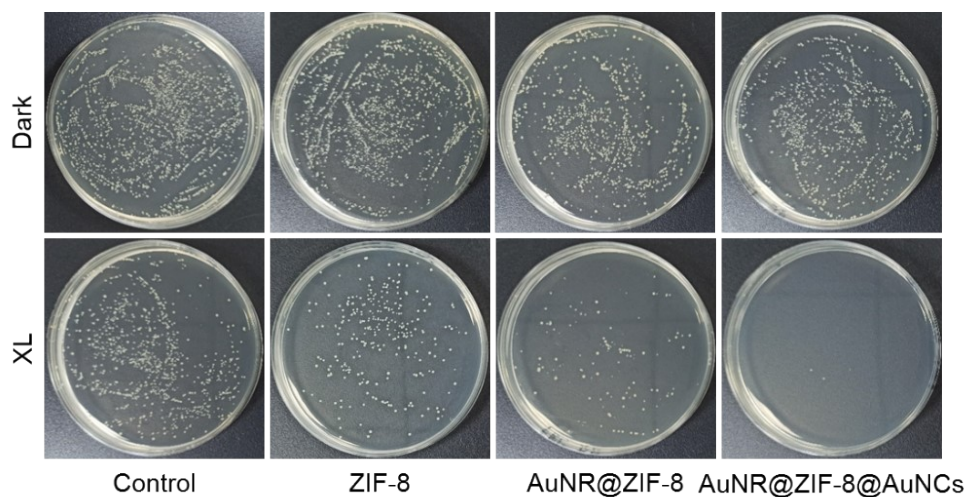

**Fig. S11.** Photographs of bacterial colonies obtained by *S. aureus* upon treatment with saline, ZIF-8, AuNR@ZIF-8, and AuNR@ZIF-8@AuNCs either in the dark or under light irradiation (XL, 30 min).

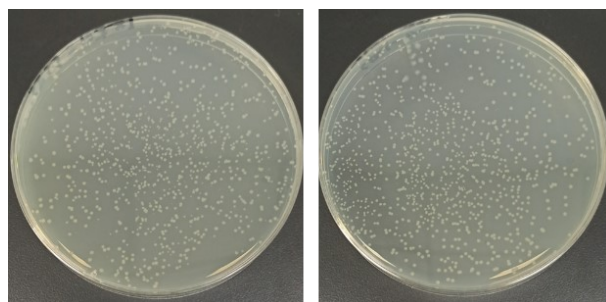

**Fig. S12.** Photographs of bacterial colonies obtained by *E. coli* upon treatment with AuNRs in the dark (left) or under light irradiation (right). AuNRs ( $10 \mu\text{g mL}^{-1}$ , the concentration of AuNRs in composites during antibacterial experiments) and *E. coli* were mixed and treated by dark or xenon lamp irradiation for 30 min, then incubated for 4 h before plate coating.

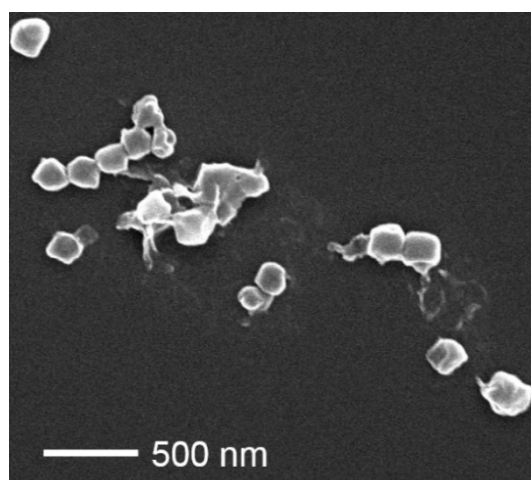

**Fig. S13.** SEM image of AuNR@ZIF-8@AuNCs after incubating with *E. coli* under a xenon lamp for 30 minutes before incubating for 4 h.

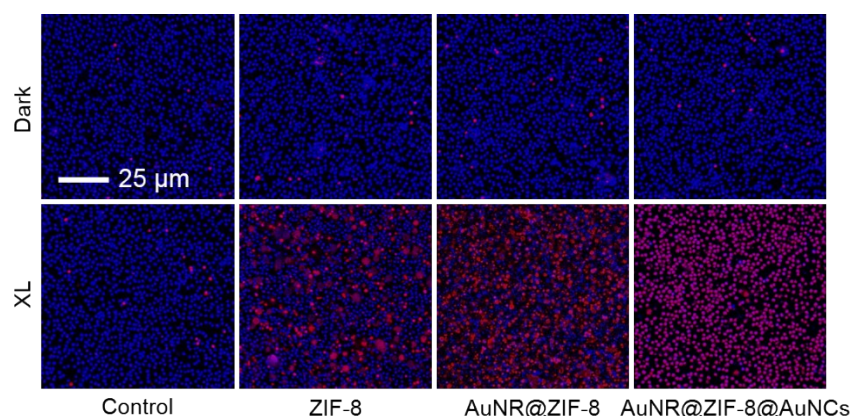

**Fig. S14.** Fluorescence staining images of *S. aureus* treated with saline, ZIF-8, AuNR@ZIF-8, and AuNR@ZIF-8@AuNCs either in the dark or under light irradiation (XL, 30 min). All the bacteria were stained by Hoechst 33342 (false color: blue). Dead bacteria were visualized by PI (false color: red).

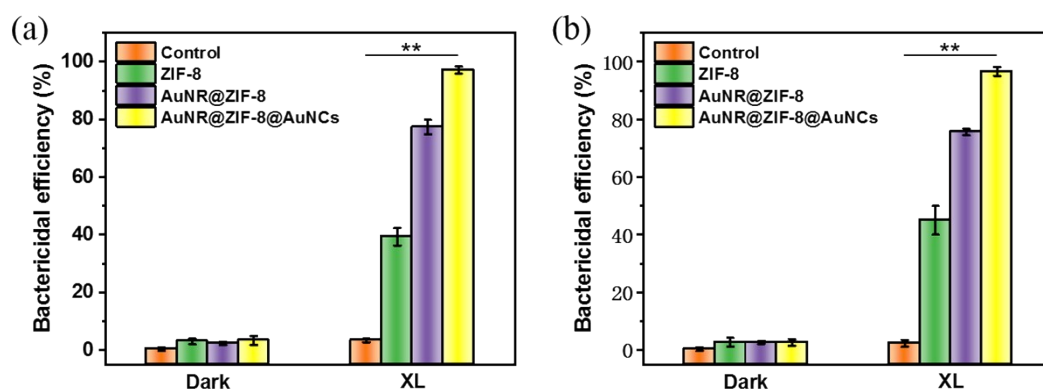

**Fig. S15.** (a) and (b) are statistical results of the bactericidal efficiency of *E. coli* and *S. aureus*, respectively, based on the fluorescence staining images. The error bars mean variations among three separate measurements (\*\*: p < 0.01).

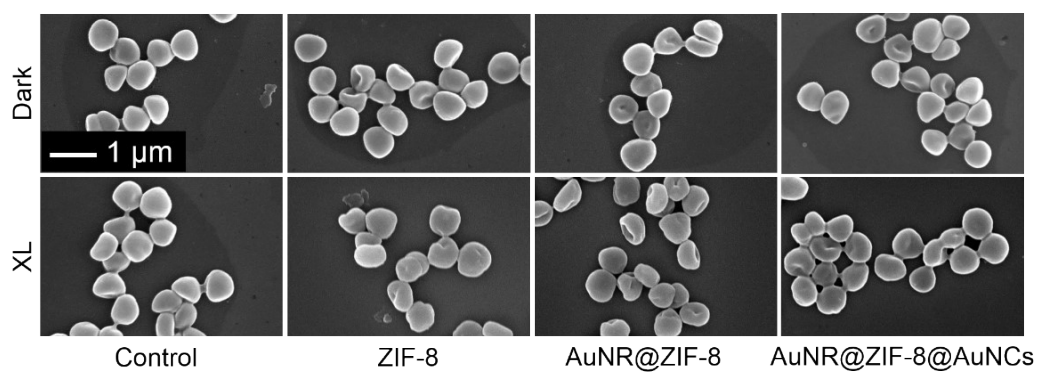

**Fig. S16.** SEM images of *S. aureus* treated with saline, ZIF-8, AuNR@ZIF-8, and AuNR@ZIF-8@AuNCs either in the dark or under light irradiation (XL, 30 min).
